# Supplementary material for: Exposure to Insecticides Modifies Gene Expression and DNA Methylation in Hematopoietic Tissues In Vitro
Source: MDPI journal article supplement (doi:10.3390/ijms24076259), 2023-03-26
Supplement: s1 [file s1]

**Supplementary Table S1. Summary of results of over-representation test of genes with altered expression in BMMCs exposed to malathion.**

| Over-representation test of UNDEREXPRESSED genes |                                                        |                                                                                                                                                                                                                                                                       |                |
|--------------------------------------------------|--------------------------------------------------------|-----------------------------------------------------------------------------------------------------------------------------------------------------------------------------------------------------------------------------------------------------------------------|----------------|
|                                                  |                                                        | Genes                                                                                                                                                                                                                                                                 | <i>p-value</i> |
| Molecular Function                               | Potassium channel activity                             | KCNK17, KCNA1, KCNA10, SGK2, KCNA2, LRRC52, KCNJ15, KCNMA1, KCNS3, KCNU1, WNK3, KCNG1, KCNJ6, KCNQ1, KCNB2, KCNJ8,                                                                                                                                                    | 3.23E-04       |
| Protein Class                                    | RNA binding protein                                    | RAVER2, SAGE1, MOV10L1, RBMXL2, SERP2, RBMY1B, MEIS1, POLR2F, LHX3, WDR33, LHX9, NOM1                                                                                                                                                                                 | 1.14E-04       |
| Over-representation test of OVEREXPRESSED genes  |                                                        |                                                                                                                                                                                                                                                                       |                |
|                                                  |                                                        |                                                                                                                                                                                                                                                                       | <i>p-value</i> |
| Biological Process                               | Leukocyte chemotaxis                                   | FIGF, CXCL13, IL1A, CCL25, CXCL1, CCL8, CCL13, CCL7, CXCL11, CCL17, CCL3L3, CCL18, CCL22, CCL19, CXCL8, CXCL3, XCL1, CXCL9, IL36G, CCL2, CCL20, CCL1, CCL14, CXCL5, CXCL10, CSCL16, VEGFA, IL1B, CXCL2, CCL3                                                          | 2.51E-14       |
|                                                  | Tumor necrosis factor response                         | CCL25,CCL8,CCL13,CCL7,CCL17,CCL3L3,CCL18,CCL22,CCL19,XCL1,CC L2,CCL20,CCL1,CCL14,CCL3                                                                                                                                                                                 | 3.76E-03       |
|                                                  | ERK1/ERK2 cascade positive regulation                  | PDGFA, CCL25, CCL8, CCL13, CCL7, CCL17, CCL3L3, CCL18, CCL22, CCL19, PDGFB, XCL1, CCL2, CCL20, CCL1, CCL14, CCL3                                                                                                                                                      | 7.25E-08       |
|                                                  | MAPK cascade positive regulation                       | FGFR3, PDGFA, CCL25, CCL8, CCL13, CCL7, IL11,CCL17,CCL3L3,CCL18,CCL22,CCL19,PDGFB,XCL1,CCL2,CCL20,CCL 1,CCL14,CCL3                                                                                                                                                    | 3.27E-08       |
|                                                  | Epidermal growth factor receptor                       | RHBDF2, EREG, CBL, AREG, HBEGF, ERFF1                                                                                                                                                                                                                                 | 1.48E-03       |
|                                                  | Cytokine mediated signaling                            | CXCL13,TNSFF14, IL1A, TNF,CCL25, CXCL1, TNFSF15,CCL8,CCL13,CCL7,IRAK2,CXCL11,CCL17,CCL3L3,CCL18,IFIT M1,CCL22,CCL19,CXCL8,CXCL3,XCL1,CXCL9,IL36G, OTUD4, CCL2, CCL20, CCL1,CCL14,CXCL5, CXCL10, LTA, SH2B2, IL1B, CXCL2, CCL3                                         | 1.11E-12       |
|                                                  | Toxic substance response                               | PPIF, MT1A, MT1E, MT1M, MT1G, MT1F, GPX8, MT1X, MT1M, PRDX4, ADH6, SOD, CHRNA5, ACHE, MT1B, MT1HL1, MT1H, MTIL                                                                                                                                                        | 7.61E-04       |
|                                                  | Cell proliferation regulation                          | FIGF, PDGFA, EREG, CD80, REG1A, BTG3, IL11, CCNA1, CD38, PDGFB, CD274, LIF, AREG, BCL6B, HBEGF, VEGFA, INCA1                                                                                                                                                          | 1.69E-03       |
|                                                  | MAPK cascade                                           | HEPACAM, IL1A, RAPGEF5, MCF2, FGFR3, FGF21, SLAMF7, CCL25, SLAMF1, RIT1, INHBA, CCL8, RASGEF1B, CCL13, CCL7, IL11, CCL17, CCL3L3, CCL18, CCL22, CCL19, FGF11, RAPGEF3, XCL1, IL36G, SPAG9, CCL2, CCL20, CCL1, CCL14                                                   | 3.24E-04       |
|                                                  | Cell adhesion                                          | PARVB, ZAN, CNTN2, L1CAM, DSP, ICAM1, HEPACAM, TNS1, PCDHB11, LRRC7, ITGB8                                                                                                                                                                                            | 4.82E-04       |
| Signaling Pathways                               | Interleukin signaling                                  | IL1A, CDKN1A, STAT1, IL3RA, IL15RA, IL2RA, AKT3, STAT4, IL11, IL4, ELK1, CXCL8, IL6, IL9, MAPK6                                                                                                                                                                       | 7.61E-04       |
|                                                  | CCCKR signaling                                        | RYR2, PDE1A, SERPINB2, PRKD1, CREM, CXCL1, SRC, REG1A, MMP7, BIRC3, ELK1, CD38, NR4A1, CXCL8, IER3, SNAI1, PTGS2, HBEGF, MMP3, CXCL2                                                                                                                                  | 4.78E-05       |
|                                                  | Chemokine and cytokine signaling-mediated inflammation | SOC56, PLCE1, STAT1, NFKB1, NFATC1, CCL8, AKT3, CCL13, CCL7, CCL3L3, CCL18, CCL22, CXCL8, GNAO1, GNAI1, PLCB4, XCL1, IL6, PTGS2, CCL20, REL, CCR2, GNG4, IFNG, CXCL10, LTA, SOC56, MYO3A, RGS1                                                                        | 7.19E-05       |
| Molecular Function                               | Cytokine activity                                      | CXCL13, TNSF14, IL1A, TNF, CCL25, CXCL1, CSF1, TNSF15, INHBA, OSM, CCL8, CCL13, CCL7, IL1, NAMPT, CXCL11, CCL17, CCL3L3, CCL18, CCL22, CCL19, PSPN, CCL8, CCL3, CSF2, GDNF, XCL1, CXCL9, IL36G, LIF, CCL2, CCL1, CCL14, CXCL5, CXCL10, LTA, CXCL16, IL1B, CXCL2, CCL3 | 5.83E-13       |
|                                                  | Growth factor binding                                  | SPINT3, FGFR3, IL2RA, KDR, CBL, MET, WFIKK2, PDGFRA, FLT1                                                                                                                                                                                                             | 3.65E-04       |

**Supplementary Table S2. Summary of results of over-representation test of genes with altered expression in PBMCs exposed to malathion**

| Over-representation test of UNDEREXPRESSED genes |                                                                  |                                                                                                                                                                                                                       |                |
|--------------------------------------------------|------------------------------------------------------------------|-----------------------------------------------------------------------------------------------------------------------------------------------------------------------------------------------------------------------|----------------|
|                                                  |                                                                  |                                                                                                                                                                                                                       | <i>p-value</i> |
| Molecular Function                               | Nucleic binding                                                  | <i>PNLDC1, ATOH1, MARVELD2, BICC1, RBFOX1, APOBEC3A, TFCP2L1, EN1, MCMD2, HIST1H4G, DLX1, ESR2, ZNF711, MSH4, HNF4G, DEC1, RBMY1B, TAF1B, SPRM3, RFX4, NFATC4, GATA4, TFAP2D, TCF7L2, NR1I3, TAL1, ZFP42</i>          | 9.59E-05       |
| Over-representation test of OVEREXPRESSED genes  |                                                                  |                                                                                                                                                                                                                       |                |
|                                                  |                                                                  |                                                                                                                                                                                                                       | <i>p-value</i> |
| Biological Process                               | Glutamatergic synapse transmission regulation, synapse signaling | <i>NLGN4X, CACNB4, GABRA3, CDHR3, STX19, SYN2, NPS, HTR3C, GRM2, GABRG, SHISA9, GRIK2, CACNB2, SCN9A, GABRG3, DLG2, SHANK2, GRM7, NLGN3, GRM3, GLRA4</i>                                                              | 3.04E-04       |
|                                                  | Cell-cell signaling                                              | <i>FGF2, STX19, TCF7L1, SYN2, FZD10, NPS, HTR3C, GRM2, GABRG, SHISA9, FZD7, NLGN4X, CACNB4, DACT2, GABRA3, AMER3, CDHR3, WNT1, ZNRF3, DLG2, SHANK2, DKK2, NID1, GRIK2, FGF17, CACNB2, SCN9A, GABRG3, WNT11, GRIK2</i> | 3.61E-04       |

**Supplementary Table S3. Summary results of over-representation test of genes with altered expression in BMBCs exposed to permethrin**

| Over-representation test of UNDEREXPRESSED genes |                                       |                                                                                                                                                                       |                |
|--------------------------------------------------|---------------------------------------|-----------------------------------------------------------------------------------------------------------------------------------------------------------------------|----------------|
|                                                  |                                       |                                                                                                                                                                       | <i>p-value</i> |
| Biological Process                               | Leukocyte chemotaxis                  | <i>CCL11, IL1A, CXCL1, CXCL6, CCL3L3, CXCL8, CXCL3, CCL21, IL36RN, CCL20, IL1B, CXCL2, CCL3</i>                                                                       | 7.17E-06       |
|                                                  | Cytokine mediated signaling pathway   | <i>CCL11, IFNA21, IL1A, TNF, CXCL1, TNFSF15, CXCL6, CCL3L3, CXCL8, CXCL3, IFNA7, CCL21, IL36RN, CCL20, IL1B, CXCL2, CCL3</i>                                          | 7.99E-06       |
|                                                  | Cytokine response                     | <i>CCL11, IFNA21, IL1A, TNF, CXCL1, TNFSF15, CXCL6, CCL3L3, CXCL8, CXCL3, IFNA7, CCL21, IL36RN, CCL20, JUN, IL1B, CXCL2, CCL3</i>                                     | 1.64E-05       |
| Molecular Function                               | Cytokine activity                     | <i>CCL11, IFNA21, IL1A, TNF, CXCL1, TNFSF15, OSM, IL31, TGFB2, NAMPT, CXCL6, A2ML1, CCL3L3, CXCL8, CXCL3, IFNA7, CCL21, IL36RN, CCL20, IL1B, CXCL2, CCL3</i>          | 2.11E-06       |
|                                                  | Enzyme binding                        | <i>AKAP5, CARD8, SH3RF2, PRDM12, RIMS2</i>                                                                                                                            | 1.87E-06       |
| Protein class                                    | Chemokine                             | <i>CCL11, CXCL1, CXCL6, CCL3L3, CXCL8, CXCL3, CCL21, CCL20, CXCL2, CCL3</i>                                                                                           | 1.84E-04       |
|                                                  | Cytokine                              | <i>CCL11, TNF, CXCL1, TNFSF15, OSM, NAMPT, CXCL6, A2ML1, CCL3L3, CXCL8, CXCL3, LEPR, CCL21, CCL20, CXCL2, CCL3D</i>                                                   | 1.51E-04       |
|                                                  | Ion channel                           | <i>FXYD3, TRPM1, SCN2A, TRPM3, SCN1A, TRPM8, ATP2B3, HTR3C, CHRNA9, PKD1L3, ATP2B2, CHRNA3, SCN3B, CLCA4, SCN9A, SCNBA, ATP4A, TRPC4, SCN7A, TRPV3, ATP2B2, HTR3B</i> | 2.14E-02       |
|                                                  |                                       |                                                                                                                                                                       |                |
| Over-representation test of OVEREXPRESSED genes  |                                       |                                                                                                                                                                       |                |
|                                                  |                                       |                                                                                                                                                                       | <i>p-value</i> |
| Signaling pathways                               | Ionotropic glutamate receptor complex | <i>GRIN2D, GRM2, GRIN1, GRIK2, SHAK2</i>                                                                                                                              | 4.06E-05       |
|                                                  |                                       |                                                                                                                                                                       |                |
| Molecular Function                               | Transmembrane signaling receptor      | <i>OR52K1, CCL13, GRM2, OR51B5, OR11I, OR51I, GPR112, OPRD1, PTCH1, CGB2, TAS2R8, PREX2, OR1L3, GNG12, AVPR2, OR56A4, IL22RA2</i>                                     | 4.09E-06       |
|                                                  |                                       |                                                                                                                                                                       |                |

**Supplementary Table S4. Summary of results of over-representation test of genes with altered expression in PBMCs exposed to permethrin**

| Over-representation test of UNDEREXPRESSED genes |                                  |                                                                                                                        |                |
|--------------------------------------------------|----------------------------------|------------------------------------------------------------------------------------------------------------------------|----------------|
|                                                  |                                  |                                                                                                                        | <i>p-value</i> |
| Signaling pathways                               | Cadherin signaling               | <i>PCDH9, PCDH15, PCDH12, WNT2, CHD19, PCDHA6, WNT4, PCDH11Y, TCF7L2, CDH19, PCDHGA5, WNT7A, PCDH7, PCDHA13, ACTG2</i> | 1.50E-04       |
|                                                  |                                  |                                                                                                                        |                |
|                                                  | Alzheimer-presenilin pathway     | <i>LDLRAD1, ACTG2, MMP12, WNT2, WNT2, WNT4, LRP3, TCF7L2, RBPJL, WNT7A, MMP2, MMP13</i>                                | 7.59E-05       |
|                                                  |                                  |                                                                                                                        |                |
| Cell component                                   | Cation channel complex           | <i>SCN1A, KCNC2, KCNS2, GRIK2, SCN8A, KCNV1, SCN7A, GRIA4, KCNB2</i>                                                   | 8.44E-04       |
| Over-representation test of OVEREXPRESSED genes  |                                  |                                                                                                                        |                |
|                                                  |                                  |                                                                                                                        | <i>p-value</i> |
| Signaling pathways                               | Vasopressin synthesis            | <i>NEU2</i>                                                                                                            | 2.49E-05       |
|                                                  |                                  |                                                                                                                        |                |
| Molecular function                               | Tyrosin kinase activity receptor | <i>EPHA7, EPHA10, RET, EPHA3, KIT, ROS1, EPHA6, PDGFRA, ALK</i>                                                        | 1.66E-04       |
|                                                  | RNA binding                      | <i>PABP5, RALYL, ZGRF1</i>                                                                                             | 1.44E-04       |
| Cell component                                   | Ion channel complex              | <i>SCN5A, GRIA3, KCNG3, KCNE4</i>                                                                                      | 6.33E-04       |
|                                                  | Nucleus                          | <i>KCNG3, KCNB1, SMDT1, KCND3, GRIA1, KCNA5, SCN9A</i>                                                                 | 1.76E-05       |

**Supplementary Table S5 Genes with highest and lowest expression in BMMCs exposed to malathion**

| <b>GeneSymbol</b>     | <b>FC abs</b> | <b>Expression</b> | <b>GeneSymbol</b>    | <b>Expression</b> | <b>FC abs</b> |
|-----------------------|---------------|-------------------|----------------------|-------------------|---------------|
| <i>KCNMA1</i>         | 11.37         | down              | <i>IL36G</i>         | up                | 170.44        |
| <i>ADAMTS20</i>       | 10.80         | down              | <i>EDN1</i>          | up                | 73.34         |
| <i>EDNRB</i>          | 9.58          | down              | <i>CYP3A5</i>        | up                | 67.78         |
| <i>LRGUK</i>          | 9.22          | down              | <i>IL6</i>           | up                | 67.62         |
| <i>ACOT6</i>          | 8.28          | down              | <i>CCL1</i>          | up                | 61.38         |
| <i>BTNL3</i>          | 7.95          | down              | <i>MMP1</i>          | up                | 51.83         |
| <i>SFTPB</i>          | 7.73          | down              | <i>MMP12</i>         | up                | 51.19         |
| <i>KCNMA1</i>         | 7.67          | down              | <i>MMP3</i>          | up                | 49.73         |
| <i>ATP2B3</i>         | 7.55          | down              | <i>CCL20</i>         | up                | 47.93         |
| <i>NFIB</i>           | 7.24          | down              | <i>IL23A</i>         | up                | 39.09         |
| <i>OR6C2</i>          | 7.21          | down              | <i>MMP10</i>         | up                | 35.05         |
| <i>LOC100129027</i>   | 7.14          | down              | <i>TFPI2</i>         | up                | 33.95         |
| <i>MACROD2</i>        | 6.99          | down              | <i>TNFSF15</i>       | up                | 26.55         |
| <i>DTNA</i>           | 6.92          | down              | <i>NEURL3</i>        | up                | 24.62         |
| <i>MAPT-IT1</i>       | 6.75          | down              | <i>CCL3</i>          | up                | 24.59         |
| <i>LOC100128164</i>   | 6.73          | down              | <i>OR11H12</i>       | up                | 23.84         |
| <i>RPH3A</i>          | 6.64          | down              | <i>ANGPTL4</i>       | up                | 22.94         |
| <i>XKR4</i>           | 6.63          | down              | <i>F3</i>            | up                | 22.38         |
| <i>lnc-CDYL2-6</i>    | 6.57          | down              | <i>C11orf96</i>      | up                | 22.24         |
| <i>FLJ45079</i>       | 6.56          | down              | <i>CXCL11</i>        | up                | 22.12         |
| <i>SSPO</i>           | 6.49          | down              | <i>TMEM158</i>       | up                | 21.49         |
| <i>GPR179</i>         | 6.45          | down              | <i>IL1A</i>          | up                | 21.36         |
| <i>RSPO2</i>          | 6.45          | down              | <i>CSF3</i>          | up                | 21.06         |
| <i>SPANXN3</i>        | 6.39          | down              | <i>HILPDA</i>        | up                | 21.00         |
| <i>C12orf40</i>       | 6.37          | down              | <i>HAS1</i>          | up                | 20.72         |
| <i>WFDC6</i>          | 6.33          | down              | <i>C15orf48</i>      | up                | 19.63         |
| <i>TMEM72-AS1</i>     | 6.25          | down              | <i>MYO1B</i>         | up                | 19.24         |
| <i>NPIPB3</i>         | 6.17          | down              | <i>ITGB8</i>         | up                | 18.86         |
| <i>lnc-C10orf71-1</i> | 6.15          | down              | <i>TNIP3</i>         | up                | 18.55         |
| <i>OPN5</i>           | 6.15          | down              | <i>HES4</i>          | up                | 18.34         |
| <i>ROBO4</i>          | 6.07          | down              | <i>IL1B</i>          | up                | 17.86         |
| <i>SNAR-C3</i>        | 6.03          | down              | <i>PI3</i>           | up                | 17.61         |
| <i>LINC00320</i>      | 6.02          | down              | <i>MET</i>           | up                | 17.58         |
| <i>LINC01255</i>      | 5.99          | down              | <i>lnc-STEAP1B-1</i> | up                | 17.07         |

|                      |      |      |                 |    |       |
|----------------------|------|------|-----------------|----|-------|
| <i>OR9G4</i>         | 5.98 | down | <i>CXCL8</i>    | up | 17.05 |
| <i>OR4F29</i>        | 5.96 | down | <i>UBD</i>      | up | 17.05 |
| <i>TTC9</i>          | 5.92 | down | <i>IDO1</i>     | up | 16.75 |
| <i>KCNMA1</i>        | 5.83 | down | <i>FAM124A</i>  | up | 16.63 |
| <i>LOC100131023</i>  | 5.80 | down | <i>CCL7</i>     | up | 16.61 |
| <i>PDE6C</i>         | 5.79 | down | <i>CCL4L2</i>   | up | 16.11 |
| <i>PROZ</i>          | 5.78 | down | <i>CYP27B1</i>  | up | 16.00 |
| <i>FGF22</i>         | 5.71 | down | <i>GBP5</i>     | up | 15.94 |
| <i>NNT</i>           | 5.68 | down | <i>INHBA</i>    | up | 15.67 |
| <i>PF4V1</i>         | 5.67 | down | <i>KRT14</i>    | up | 15.15 |
| <i>FLJ46120</i>      | 5.63 | down | <i>IRAK2</i>    | up | 15.11 |
| <i>VLDLR-AS1</i>     | 5.63 | down | <i>KRT17</i>    | up | 15.07 |
| <i>FAM71D</i>        | 5.62 | down | <i>CD69</i>     | up | 15.04 |
| <i>AMOT</i>          | 5.61 | down | <i>MT2A</i>     | up | 14.57 |
| <i>CEACAM7</i>       | 5.58 | down | <i>NR4A1</i>    | up | 14.51 |
| <i>OR4F21</i>        | 5.54 | down | <i>CYP3A7</i>   | up | 13.92 |
| <i>ODF2L</i>         | 5.50 | down | <i>IL11</i>     | up | 13.91 |
| <i>LINC01551</i>     | 5.48 | down | <i>SLCO4A1</i>  | up | 13.77 |
| <i>TTY3</i>          | 5.42 | down | <i>PLIN2</i>    | up | 13.60 |
| <i>HOXB-AS3</i>      | 5.42 | down | <i>DKK2</i>     | up | 13.55 |
| <i>OR4D1</i>         | 5.41 | down | <i>TNFAIP6</i>  | up | 13.35 |
| <i>SORCS3-AS1</i>    | 5.41 | down | <i>RRAD</i>     | up | 13.19 |
| <i>TUBB8</i>         | 5.38 | down | <i>SERPINB2</i> | up | 13.16 |
| <i>lnc-IL4R-2</i>    | 5.33 | down | <i>RSAD2</i>    | up | 12.99 |
| <i>FGG</i>           | 5.30 | down | <i>PLS3</i>     | up | 12.63 |
| <i>ARMC3</i>         | 5.29 | down | <i>CD274</i>    | up | 12.47 |
| <i>SPINK13</i>       | 5.29 | down | <i>OCSTAMP</i>  | up | 12.31 |
| <i>TPTE2P3</i>       | 5.29 | down | <i>CCL3L3</i>   | up | 12.20 |
| <i>OR2AT4</i>        | 5.29 | down | <i>CXCL5</i>    | up | 12.02 |
| <i>LOC646736</i>     | 5.27 | down | <i>HBEGF</i>    | up | 11.83 |
| <i>STK36</i>         | 5.25 | down | <i>IFI44L</i>   | up | 11.65 |
| <i>PROX2</i>         | 5.24 | down | <i>NEU4</i>     | up | 11.63 |
| <i>LOC100291323</i>  | 5.22 | down | <i>MT1B</i>     | up | 11.23 |
| <i>lnc-C3orf37-1</i> | 5.16 | down | <i>CSF2</i>     | up | 11.04 |
| <i>TRIM48</i>        | 5.15 | down | <i>CH25H</i>    | up | 10.84 |
| <i>NDUFS7</i>        | 5.15 | down | <i>TNF</i>      | up | 10.82 |
| <i>CNTFR-AS1</i>     | 5.14 | down | <i>MT1M</i>     | up | 10.76 |
| <i>LOC541467</i>     | 5.14 | down | <i>MT1E</i>     | up | 10.60 |
| <i>LOC100130452</i>  | 5.12 | down | <i>DCN</i>      | up | 10.55 |
| <i>DOC2B</i>         | 5.09 | down | <i>EBI3</i>     | up | 10.49 |

|           |      |      |           |    |       |
|-----------|------|------|-----------|----|-------|
| OMG       | 5.08 | down | FGFBP1    | up | 10.47 |
| LOC219690 | 5.07 | down | NTN1      | up | 10.27 |
| SNTG1     | 5.06 | down | GBP3      | up | 10.26 |
| LINC00602 | 5.06 | down | GBP1      | up | 9.91  |
| DDR1      | 5.05 | down | CFB       | up | 9.79  |
| DIO1      | 5.04 | down | MFSD2A    | up | 9.70  |
| LOC151121 | 5.02 | down | IL13      | up | 9.63  |
| PITX1     | 5.00 | down | MT1L      | up | 9.27  |
| PCDHB12   | 4.99 | down | ADM       | up | 9.03  |
| C8orf34   | 4.99 | down | NR4A3     | up | 8.97  |
| B9D1      | 4.97 | down | SGPP2     | up | 8.87  |
| NEK10     | 4.97 | down | SGPP2     | up | 8.78  |
| TXNRD3NB  | 4.96 | down | GOT1L1    | up | 8.77  |
| CRISP3    | 4.95 | down | SCG5      | up | 8.69  |
| LOC644852 | 4.94 | down | LIF       | up | 8.68  |
| ADAMTS12  | 4.94 | down | AQP9      | up | 8.65  |
| LINGO1    | 4.92 | down | USP27X    | up | 8.59  |
| TRPC4     | 4.92 | down | C17orf96  | up | 8.53  |
| ADAM32    | 4.90 | down | CCM2L     | up | 8.53  |
| C3orf80   | 4.90 | down | DUSP5     | up | 8.52  |
| LOC1720   | 4.88 | down | SSTR2     | up | 8.50  |
| PCDH15    | 4.88 | down | CCL19     | up | 8.43  |
| PLP1      | 4.83 | down | IL24      | up | 8.38  |
| CAPN8     | 4.83 | down | LOC388780 | up | 8.33  |
| HOXA-AS2  | 4.83 | down | ST8SIA4   | up | 8.23  |
| IFNA2     | 4.81 | down | PLAUR     | up | 8.18  |

**Supplementary Table S6 Genes with highest and lowest expression in PBMCs exposed to malathion**

| <b>GeneSymbol</b>   | <b>FC abs</b> | <b>Expression</b> | <b>GeneSymbol</b>   | <b>Fc abs</b> | <b>Expression</b> |
|---------------------|---------------|-------------------|---------------------|---------------|-------------------|
| <i>MUC12</i>        | 7.21          | down              | <i>ST6GAL2</i>      | 10.95         | up                |
| <i>RBP3</i>         | 6.64          | down              | <i>RAPGEF5</i>      | 6.69          | up                |
| <i>TNFAIP8L3</i>    | 6.58          | down              | <i>PLCB4</i>        | 6.35          | up                |
| <i>LINC00307</i>    | 6.13          | down              | <i>EFCAB9</i>       | 6.29          | up                |
| <i>PTCRA</i>        | 6.04          | down              | <i>GALNT16</i>      | 5.67          | up                |
| <i>LOC440117</i>    | 5.73          | down              | <i>LEMD1</i>        | 5.61          | up                |
| <i>SPATA17</i>      | 5.59          | down              | <i>ANKRD55</i>      | 5.24          | up                |
| <i>AKR1E2</i>       | 5.55          | down              | <i>PLIN1</i>        | 5.21          | up                |
| <i>LRRC37A6P</i>    | 5.24          | down              | <i>CECR7</i>        | 5.04          | up                |
| <i>LRP3</i>         | 5.12          | down              | <i>BSND</i>         | 5.00          | up                |
| <i>EN1</i>          | 5.05          | down              | <i>LINC01183</i>    | 4.98          | up                |
| <i>KIF6</i>         | 4.97          | down              | <i>DLG2</i>         | 4.92          | up                |
| <i>ANGPTL2</i>      | 4.93          | down              | <i>LOC728339</i>    | 4.87          | up                |
| <i>STRA6</i>        | 4.88          | down              | <i>TDRD1</i>        | 4.81          | up                |
| <i>CLDN22</i>       | 4.81          | down              | <i>ERBB4</i>        | 4.75          | up                |
| <i>LOC646034</i>    | 4.81          | down              | <i>TDRD6</i>        | 4.72          | up                |
| <i>C12orf54</i>     | 4.64          | down              | <i>LCORL</i>        | 4.70          | up                |
| <i>AMOT</i>         | 4.58          | down              | <i>GP5</i>          | 4.62          | up                |
| <i>SCN9A</i>        | 4.57          | down              | <i>DSP</i>          | 4.61          | up                |
| <i>lnc-CD99L2-1</i> | 4.56          | down              | <i>SHISA9</i>       | 4.61          | up                |
| <i>ZNF713</i>       | 4.55          | down              | <i>LINC00515</i>    | 4.52          | up                |
| <i>PLEKHD1</i>      | 4.52          | down              | <i>LINC01152</i>    | 4.51          | up                |
| <i>TNFSF15</i>      | 4.49          | down              | <i>C8orf22</i>      | 4.51          | up                |
| <i>ANK1</i>         | 4.47          | down              | <i>SHISA3</i>       | 4.46          | up                |
| <i>LINC01255</i>    | 4.45          | down              | <i>lnc-ZNF717-1</i> | 4.45          | up                |
| <i>CPNE9</i>        | 4.44          | down              | <i>DDC</i>          | 4.40          | up                |
| <i>CABP7</i>        | 4.42          | down              | <i>RNF170</i>       | 4.37          | up                |
| <i>CMA1</i>         | 4.41          | down              | <i>ACBD5</i>        | 4.35          | up                |
| <i>EDNRB</i>        | 4.41          | down              | <i>ANKRD20A2</i>    | 4.31          | up                |
| <i>RAB3C</i>        | 4.40          | down              | <i>TCF7L1</i>       | 4.31          | up                |
| <i>PPBPP2</i>       | 4.39          | down              | <i>RELN</i>         | 4.30          | up                |
| <i>PALMD</i>        | 4.37          | down              | <i>ENKUR</i>        | 4.28          | up                |
| <i>CEBPA-AS1</i>    | 4.35          | down              | <i>LOC100288619</i> | 4.28          | up                |
| <i>TPD52L3</i>      | 4.34          | down              | <i>CACNA1C</i>      | 4.25          | up                |
| <i>WBP2NL</i>       | 4.34          | down              | <i>IRX2</i>         | 4.23          | up                |
| <i>C9orf117</i>     | 4.34          | down              | <i>ZFPM2</i>        | 4.20          | up                |



|                       |      |      |                     |      |    |
|-----------------------|------|------|---------------------|------|----|
| <i>S100A1</i>         | 4.33 | down | <i>LIN28B</i>       | 4.18 | up |
| <i>LOC285857</i>      | 4.32 | down | <i>FILIP1L</i>      | 4.17 | up |
| <i>TIFAB</i>          | 4.25 | down | <i>GMNC</i>         | 4.16 | up |
| <i>RBP7</i>           | 4.24 | down | <i>ST7-AS2</i>      | 4.15 | up |
| <i>TMEM241</i>        | 4.23 | down | <i>EPHA10</i>       | 4.15 | up |
| <i>LOC643711</i>      | 4.22 | down | <i>LINC01433</i>    | 4.13 | up |
| <i>NPIPB3</i>         | 4.20 | down | <i>ADRA2A</i>       | 4.12 | up |
| <i>ARNT2</i>          | 4.19 | down | <i>CNTN4</i>        | 4.08 | up |
| <i>TRPC4</i>          | 4.19 | down | <i>H19</i>          | 4.02 | up |
| <i>HOXB-AS3</i>       | 4.16 | down | <i>FAM27B</i>       | 4.02 | up |
| <i>USP6</i>           | 4.14 | down | <i>MYBPHL</i>       | 4.02 | up |
| <i>LOC102724484</i>   | 4.14 | down | <i>ZSCAN23</i>      | 4.01 | up |
| <i>LYPD1</i>          | 4.09 | down | <i>ZBED3-AS1</i>    | 4.00 | up |
| <i>CES1P2</i>         | 4.05 | down | <i>RNF183</i>       | 4.00 | up |
| <i>KIAA1598</i>       | 4.04 | down | <i>GNAI1</i>        | 3.97 | up |
| <i>WIPF3</i>          | 4.03 | down | <i>LMBR1</i>        | 3.97 | up |
| <i>TMEM114</i>        | 4.01 | down | <i>RS1</i>          | 3.96 | up |
| <i>FAM229B</i>        | 4.01 | down | <i>LOC441666</i>    | 3.95 | up |
| <i>LOC100128198</i>   | 4.00 | down | <i>ADAMTS6</i>      | 3.93 | up |
| <i>C1QL2</i>          | 3.99 | down | <i>LINC00163</i>    | 3.93 | up |
| <i>DSPP</i>           | 3.99 | down | <i>DISC1</i>        | 3.93 | up |
| <i>LELP1</i>          | 3.97 | down | <i>CR1</i>          | 3.93 | up |
| <i>ZFP42</i>          | 3.97 | down | <i>SPDYA</i>        | 3.93 | up |
| <i>MCHR2-AS1</i>      | 3.96 | down | <i>GRK1</i>         | 3.93 | up |
| <i>KAZN</i>           | 3.95 | down | <i>FAM87B</i>       | 3.90 | up |
| <i>SLC14A1</i>        | 3.94 | down | <i>LZTS1</i>        | 3.90 | up |
| <i>TCHHL1</i>         | 3.94 | down | <i>DEFB108B</i>     | 3.90 | up |
| <i>RIMBP2</i>         | 3.93 | down | <i>KRTAP13-3</i>    | 3.89 | up |
| <i>LOC389332</i>      | 3.93 | down | <i>LINC00305</i>    | 3.89 | up |
| <i>TDRP</i>           | 3.91 | down | <i>UMODL1</i>       | 3.86 | up |
| <i>SST</i>            | 3.89 | down | <i>ANKRD62</i>      | 3.81 | up |
| <i>PDIA2</i>          | 3.89 | down | <i>STH</i>          | 3.81 | up |
| <i>XLOC_l2_009136</i> | 3.89 | down | <i>USP2</i>         | 3.79 | up |
| <i>FAM230B</i>        | 3.88 | down | <i>MYZAP</i>        | 3.77 | up |
| <i>ODAM</i>           | 3.88 | down | <i>CLDN12</i>       | 3.77 | up |
| <i>AQP12A</i>         | 3.87 | down | <i>OMG</i>          | 3.75 | up |
| <i>Inc-IRF4-1</i>     | 3.86 | down | <i>CCDC126</i>      | 3.73 | up |
| <i>FAM227B</i>        | 3.84 | down | <i>FLT4</i>         | 3.73 | up |
| <i>ZSCAN5B</i>        | 3.81 | down | <i>GAS2</i>         | 3.71 | up |
| <i>CYMP</i>           | 3.80 | down | <i>LOC100133920</i> | 3.70 | up |

|                     |      |      |                       |      |    |
|---------------------|------|------|-----------------------|------|----|
| <i>SLC4A5</i>       | 3.80 | down | <i>XLOC_l2_005020</i> | 3.69 | up |
| <i>CPZ</i>          | 3.78 | down | <i>LOC101930072</i>   | 3.67 | up |
| <i>KCNQ1DN</i>      | 3.77 | down | <i>LOC400756</i>      | 3.66 | up |
| <i>CROCCP3</i>      | 3.75 | down | <i>TRAM1L1</i>        | 3.66 | up |
| <i>GATA4</i>        | 3.74 | down | <i>TMEM65</i>         | 3.65 | up |
| <i>OR4F21</i>       | 3.73 | down | <i>CCSER1</i>         | 3.64 | up |
| <i>C10orf53</i>     | 3.73 | down | <i>PEG10</i>          | 3.61 | up |
| <i>LOC101448202</i> | 3.70 | down | <i>OR2W3</i>          | 3.61 | up |
| <i>LOC100128164</i> | 3.68 | down | <i>CARTPT</i>         | 3.59 | up |
| <i>SRP14-AS1</i>    | 3.67 | down | <i>HSF2BP</i>         | 3.59 | up |
| <i>SEC14L6</i>      | 3.67 | down | <i>LOC100128607</i>   | 3.59 | up |
| <i>LOC100131581</i> | 3.66 | down | <i>FAM90A27P</i>      | 3.59 | up |
| <i>RFT1</i>         | 3.65 | down | <i>ASIC5</i>          | 3.58 | up |
| <i>APLF</i>         | 3.65 | down | <i>CDK15</i>          | 3.58 | up |
| <i>LOC100131023</i> | 3.62 | down | <i>HCG4B</i>          | 3.57 | up |
| <i>MBP</i>          | 3.62 | down | <i>MGC24103</i>       | 3.57 | up |
| <i>PLVAP</i>        | 3.62 | down | <i>CASC11</i>         | 3.57 | up |
| <i>HTRA4</i>        | 3.61 | down | <i>RHOXF1</i>         | 3.57 | up |
| <i>SPINK4</i>       | 3.61 | down | <i>TRPC5OS</i>        | 3.57 | up |
| <i>lnc-ELF2-2</i>   | 3.60 | down | <i>MARCH3</i>         | 3.56 | up |
| <i>MEIS1</i>        | 3.60 | down | <i>PCDHGB1</i>        | 3.55 | up |
| <i>MAATS1</i>       | 3.59 | down | <i>KRTAP27-1</i>      | 3.53 | up |
| <i>HNMT</i>         | 3.59 | down | <i>KCNH5</i>          | 3.53 | up |
| <i>lnc-NPHS2-1</i>  | 3.59 | down | <i>FAM150B</i>        | 3.52 | up |

**Supplementary Table S7 Genes with highest and lowest expression in BMMCs exposed to permethrin**

| <b>GeneSymbol</b>   | <b>FC abs</b> | <b>Exprpression</b> | <b>GeneSymbol</b>   | <b>FC abs</b> | <b>Expression</b> |
|---------------------|---------------|---------------------|---------------------|---------------|-------------------|
| <i>ABCC9</i>        | 16.41         | down                | <i>ST6GAL2</i>      | 7.30          | up                |
| <i>LOC440117</i>    | 8.02          | down                | <i>PPAPDC1A</i>     | 6.84          | up                |
| <i>LOC100131599</i> | 7.43          | down                | <i>RAB43</i>        | 6.77          | up                |
| <i>TPTE2P3</i>      | 7.42          | down                | <i>TSPAN15</i>      | 6.68          | up                |
| <i>SSTR2</i>        | 7.23          | down                | <i>PTPRF</i>        | 6.55          | up                |
| <i>PLP1</i>         | 7.19          | down                | <i>LOC157273</i>    | 6.17          | up                |
| <i>SFTPB</i>        | 7.05          | down                | <i>OOEP</i>         | 5.76          | up                |
| <i>LINC00700</i>    | 7.05          | down                | <i>CROT</i>         | 5.76          | up                |
| <i>LINC01551</i>    | 7.01          | down                | <i>L2HGDH</i>       | 5.74          | up                |
| <i>LINC00307</i>    | 6.93          | down                | <i>CRYM-AS1</i>     | 5.64          | up                |
| <i>PWRN1</i>        | 6.90          | down                | <i>DCN</i>          | 5.57          | up                |
| <i>NPIPB3</i>       | 6.84          | down                | <i>FAM172BP</i>     | 5.51          | up                |
| <i>EDNRB</i>        | 6.82          | down                | <i>FANK1</i>        | 5.50          | up                |
| <i>lnc-CDYL2-6</i>  | 6.67          | down                | <i>LOC100131581</i> | 5.47          | up                |
| <i>CSN3</i>         | 6.65          | down                | <i>TRIQQ</i>        | 5.40          | up                |
| <i>TTY3</i>         | 6.61          | down                | <i>LOC100131289</i> | 5.38          | up                |
| <i>SLC7A3</i>       | 6.49          | down                | <i>MBD2</i>         | 5.32          | up                |
| <i>COL6A4P2</i>     | 6.47          | down                | <i>HS3ST3B1</i>     | 5.24          | up                |
| <i>KIAA1598</i>     | 6.34          | down                | <i>ZNF385D</i>      | 5.21          | up                |
| <i>IL1A</i>         | 6.23          | down                | <i>JAM2</i>         | 5.18          | up                |
| <i>ARPIN</i>        | 6.17          | down                | <i>ZNF645</i>       | 5.18          | up                |
| <i>ATP5L2</i>       | 6.13          | down                | <i>BRSK1</i>        | 5.12          | up                |
| <i>HOXA-AS2</i>     | 6.06          | down                | <i>YIF1B</i>        | 5.01          | up                |
| <i>LOC401410</i>    | 6.05          | down                | <i>CHST1</i>        | 4.83          | up                |
| <i>XAGE2</i>        | 6.01          | down                | <i>LINC00900</i>    | 4.83          | up                |
| <i>GREM2</i>        | 5.99          | down                | <i>IFIT1</i>        | 4.81          | up                |
| <i>ADAM30</i>       | 5.88          | down                | <i>GALNT16</i>      | 4.79          | up                |
| <i>ANKRD31</i>      | 5.87          | down                | <i>CD300LG</i>      | 4.78          | up                |
| <i>FOLH1B</i>       | 5.87          | down                | <i>LOC729860</i>    | 4.77          | up                |
| <i>PDGFD</i>        | 5.78          | down                | <i>GBA3</i>         | 4.76          | up                |
| <i>DCHS2</i>        | 5.74          | down                | <i>PRR27</i>        | 4.75          | up                |
| <i>C10orf53</i>     | 5.73          | down                | <i>LOC727799</i>    | 4.74          | up                |
| <i>LOC729159</i>    | 5.69          | down                | <i>TMEM72</i>       | 4.74          | up                |
| <i>ITGB6</i>        | 5.69          | down                | <i>PGC</i>          | 4.69          | up                |
| <i>KRT40</i>        | 5.66          | down                | <i>C6orf223</i>     | 4.67          | up                |
| <i>DTHD1</i>        | 5.65          | down                | <i>NFASC</i>        | 4.60          | up                |

|                      |      |      |                           |      |    |
|----------------------|------|------|---------------------------|------|----|
| <i>LOC285889</i>     | 5.65 | down | <i>LOC101930611</i>       | 4.60 | up |
| <i>PCDH15</i>        | 5.64 | down | <i>LOC403312</i>          | 4.56 | up |
| <i>PROZ</i>          | 5.62 | down | <i>IQCF1</i>              | 4.48 | up |
| <i>BSPH1</i>         | 5.59 | down | <i>SLC18A1</i>            | 4.47 | up |
| <i>LOC442028</i>     | 5.59 | down | <i>MEDAG</i>              | 4.46 | up |
| <i>C12orf40</i>      | 5.55 | down | <i>FBLN2</i>              | 4.43 | up |
| <i>OPN5</i>          | 5.54 | down | <i>UG0898H09</i>          | 4.37 | up |
| <i>FAM154A</i>       | 5.51 | down | <i>BDNF</i>               | 4.30 | up |
| <i>LOC102723778</i>  | 5.49 | down | <i>SLC9B1</i>             | 4.30 | up |
| <i>FABP12</i>        | 5.48 | down | <i>SMIM22</i>             | 4.29 | up |
| <i>C1orf141</i>      | 5.47 | down | <i>STRA6</i>              | 4.25 | up |
| <i>MAPRE3</i>        | 5.44 | down | <i>GDF1</i>               | 4.25 | up |
| <i>RPL34-AS1</i>     | 5.43 | down | <i>SAMM50</i>             | 4.24 | up |
| <i>CNKSR2</i>        | 5.42 | down | <i>LOC100996813</i>       | 4.24 | up |
| <i>CLIC6</i>         | 5.41 | down | <i>SFTA2</i>              | 4.20 | up |
| <i>LINC00992</i>     | 5.41 | down | <i>lnc-AC005323.1.1-1</i> | 4.19 | up |
| <i>TRPV3</i>         | 5.38 | down | <i>LOC100996465</i>       | 4.18 | up |
| <i>LPPR4</i>         | 5.38 | down | <i>SSX2IP</i>             | 4.18 | up |
| <i>GPX8</i>          | 5.37 | down | <i>LOC613266</i>          | 4.17 | up |
| <i>FAM83C</i>        | 5.34 | down | <i>KITLG</i>              | 4.17 | up |
| <i>lnc-PAX9-2</i>    | 5.32 | down | <i>CD72</i>               | 4.16 | up |
| <i>FAM19A3</i>       | 5.27 | down | <i>OR10A6</i>             | 4.16 | up |
| <i>LMOD1</i>         | 5.26 | down | <i>ZDHHC23</i>            | 4.15 | up |
| <i>LOC285043</i>     | 5.25 | down | <i>TDRD6</i>              | 4.15 | up |
| <i>LINC01255</i>     | 5.22 | down | <i>IDO2</i>               | 4.14 | up |
| <i>LINC00207</i>     | 5.22 | down | <i>ABHD16B</i>            | 4.14 | up |
| <i>TRPM8</i>         | 5.20 | down | <i>AOX1</i>               | 4.13 | up |
| <i>LOC100129072</i>  | 5.21 | down | <i>PABPC5</i>             | 4.13 | up |
| <i>HMCN2</i>         | 5.19 | down | <i>LOC729451</i>          | 4.12 | up |
| <i>RBMXL2</i>        | 5.16 | down | <i>FAM150B</i>            | 4.12 | up |
| <i>LOC100131023</i>  | 5.14 | down | <i>ACBD5</i>              | 4.11 | up |
| <i>LOC100131497</i>  | 5.14 | down | <i>WFDC11</i>             | 4.10 | up |
| <i>lnc-SLC19A3-1</i> | 5.13 | down | <i>NLRP4</i>              | 4.10 | up |
| <i>FGFR2</i>         | 5.12 | down | <i>LOC100129027</i>       | 4.10 | up |
| <i>ATP10B</i>        | 5.08 | down | <i>FIGF</i>               | 4.09 | up |
| <i>HS6ST3</i>        | 5.04 | down | <i>PANX2</i>              | 4.08 | up |
| <i>GATA4</i>         | 5.04 | down | <i>ACTL7B</i>             | 4.03 | up |
| <i>USP29</i>         | 5.03 | down | <i>FGD2</i>               | 4.03 | up |
| <i>RD3</i>           | 5.03 | down | <i>FAM230A</i>            | 4.02 | up |
| <i>HSD52</i>         | 5.02 | down | <i>C1QTNF1</i>            | 4.02 | up |

|                      |      |      |                     |      |    |
|----------------------|------|------|---------------------|------|----|
| <i>NCKAP5</i>        | 5.02 | down | <i>OR2J2</i>        | 4.01 | up |
| <i>GPRIN1</i>        | 5.01 | down | <i>GRM2</i>         | 4.00 | up |
| <i>SCN9A</i>         | 5.01 | down | <i>CGB2</i>         | 4.00 | up |
| <i>LOC100268168</i>  | 5.00 | down | <i>IQCC</i>         | 3.99 | up |
| <i>lnc-CCDC148-1</i> | 4.98 | down | <i>PRR27</i>        | 3.99 | up |
| <i>AMOT</i>          | 4.98 | down | <i>PIGR</i>         | 3.97 | up |
| <i>MZF1-AS1</i>      | 4.96 | down | <i>KLHDC8A</i>      | 3.95 | up |
| <i>AJAP1</i>         | 4.95 | down | <i>TAS2R4</i>       | 3.95 | up |
| <i>lnc-IL4R-2</i>    | 4.95 | down | <i>IL15RA</i>       | 3.93 | up |
| <i>LOC100126448</i>  | 4.91 | down | <i>SLC6A20</i>      | 3.93 | up |
| <i>TPTE2</i>         | 4.90 | down | <i>PARD3</i>        | 3.91 | up |
| <i>PLA2G10</i>       | 4.90 | down | <i>KLB</i>          | 3.90 | up |
| <i>EFCAB10</i>       | 4.89 | down | <i>GJA9</i>         | 3.89 | up |
| <i>CA3</i>           | 4.87 | down | <i>TRAM1L1</i>      | 3.88 | up |
| <i>TBX15</i>         | 4.86 | down | <i>PFKFB1</i>       | 3.87 | up |
| <i>ZNF569</i>        | 4.85 | down | <i>EGFEM1P</i>      | 3.87 | up |
| <i>LINC01102</i>     | 4.82 | down | <i>LOC728752</i>    | 3.86 | up |
| <i>THSD4</i>         | 4.81 | down | <i>LOC388820</i>    | 3.85 | up |
| <i>RGS5</i>          | 4.80 | down | <i>LOC100134368</i> | 3.85 | up |
| <i>lnc-LBH-1</i>     | 4.75 | down | <i>LINC00910</i>    | 3.82 | up |
| <i>LOC151121</i>     | 4.75 | down | <i>RAB26</i>        | 3.81 | up |
| <i>KIAA1549L</i>     | 4.75 | down | <i>C1orf86</i>      | 3.79 | up |
| <i>PCDH9</i>         | 4.74 | down | <i>CDKL4</i>        | 3.78 | up |
| <i>THBS2</i>         | 4.74 | down | <i>DBF4B</i>        | 3.78 | up |

**Supplementary Table S8 Genes with highest and lowest expression in PBMCs exposed to permethrin**

| <b>GeneSymbol</b>     | <b>FC abs</b> | <b>Expresssion</b> | <b>GeneSymbol</b> | <b>FC abs</b> | <b>Expression</b> |
|-----------------------|---------------|--------------------|-------------------|---------------|-------------------|
| <i>lnc-FAM189A2-1</i> | 6.32          | down               | <i>BLOC1S5</i>    | 17.43         | up                |
| <i>PWRN1</i>          | 5.98          | down               | <i>ST6GAL2</i>    | 16.07         | up                |
| <i>LOC51145</i>       | 5.77          | down               | <i>NPSR1</i>      | 7.57          | up                |
| <i>STRA6</i>          | 5.70          | down               | <i>POU5F2</i>     | 7.06          | up                |
| <i>TUBB8</i>          | 5.64          | down               | <i>SPRR1A</i>     | 6.04          | up                |
| <i>LOC440386</i>      | 5.37          | down               | <i>ZNF385D</i>    | 5.96          | up                |
| <i>LOC401220</i>      | 5.33          | down               | <i>UPB1</i>       | 5.93          | up                |
| <i>RSPH6A</i>         | 5.24          | down               | <i>RBMX2</i>      | 5.84          | up                |
| <i>lnc-TMEM30B-2</i>  | 5.21          | down               | <i>DISC1</i>      | 5.68          | up                |
| <i>FLJ36000</i>       | 5.09          | down               | <i>SCART1</i>     | 5.52          | up                |
| <i>CPXM2</i>          | 5.03          | down               | <i>SYN2</i>       | 5.47          | up                |
| <i>EPX</i>            | 5.02          | down               | <i>LINC00696</i>  | 5.17          | up                |
| <i>C17orf67</i>       | 4.96          | down               | <i>PCDHA8</i>     | 5.10          | up                |
| <i>COL8A1</i>         | 4.92          | down               | <i>WNT11</i>      | 5.08          | up                |
| <i>SLC14A1</i>        | 4.91          | down               | <i>RAPGEF5</i>    | 4.96          | up                |
| <i>KAAG1</i>          | 4.89          | down               | <i>PER3</i>       | 4.95          | up                |
| <i>IL13RA2</i>        | 4.80          | down               | <i>KLK8</i>       | 4.94          | up                |
| <i>LOC541467</i>      | 4.73          | down               | <i>CNKSR2</i>     | 4.88          | up                |
| <i>MYL1</i>           | 4.68          | down               | <i>LOC441666</i>  | 4.85          | up                |
| <i>FUNDC2</i>         | 4.65          | down               | <i>ST8SIA4</i>    | 4.85          | up                |
| <i>OR1L8</i>          | 4.61          | down               | <i>LINC00371</i>  | 4.83          | up                |
| <i>EFCAB8</i>         | 4.58          | down               | <i>HMGA2</i>      | 4.81          | up                |
| <i>C10orf105</i>      | 4.57          | down               | <i>ZDHHC23</i>    | 4.81          | up                |
| <i>FBXL2</i>          | 4.57          | down               | <i>RHBDL2</i>     | 4.78          | up                |
| <i>ANKRD6</i>         | 4.57          | down               | <i>TRIQQ</i>      | 4.76          | up                |
| <i>GRIP2</i>          | 4.51          | down               | <i>DSP</i>        | 4.74          | up                |
| <i>WLS</i>            | 4.47          | down               | <i>ARSK</i>       | 4.64          | up                |
| <i>MIR99AHG</i>       | 4.47          | down               | <i>FOXI1</i>      | 4.60          | up                |
| <i>LOC389332</i>      | 4.45          | down               | <i>KDM5A</i>      | 4.59          | up                |
| <i>A2ML1</i>          | 4.39          | down               | <i>SULT1C2P1</i>  | 4.59          | up                |
| <i>B3GALT2</i>        | 4.38          | down               | <i>HBBP1</i>      | 4.55          | up                |
| <i>LOC100129175</i>   | 4.38          | down               | <i>ZBED3-AS1</i>  | 4.52          | up                |
| <i>CAPN8</i>          | 4.35          | down               | <i>PCDHB18P</i>   | 4.48          | up                |
| <i>LOC100128402</i>   | 4.34          | down               | <i>PID1</i>       | 4.46          | up                |
| <i>LOC102723895</i>   | 4.32          | down               | <i>PDHA2</i>      | 4.46          | up                |
| <i>LRRC1</i>          | 4.31          | down               | <i>SHISA3</i>     | 4.42          | up                |

|                     |      |      |                      |      |    |
|---------------------|------|------|----------------------|------|----|
| <i>ARPIN</i>        | 4.29 | down | <i>TRAM1L1</i>       | 4.41 | up |
| <i>TMEM247</i>      | 4.29 | down | <i>TAS2R20</i>       | 4.40 | up |
| <i>LOC101929465</i> | 4.27 | down | <i>RGSL1</i>         | 4.38 | up |
| <i>FRMPD2</i>       | 4.26 | down | <i>NBPF25P</i>       | 4.38 | up |
| <i>IFIT1B</i>       | 4.23 | down | <i>SFTPBP</i>        | 4.35 | up |
| <i>SPATA17</i>      | 4.18 | down | <i>MYT1</i>          | 4.34 | up |
| <i>LOC389834</i>    | 4.17 | down | <i>PPP1R17</i>       | 4.33 | up |
| <i>ROBO1</i>        | 4.16 | down | <i>C2orf27B</i>      | 4.27 | up |
| <i>LOC100128164</i> | 4.16 | down | <i>HIST2H2BF</i>     | 4.26 | up |
| <i>WBSCR28</i>      | 4.16 | down | <i>GAB1</i>          | 4.25 | up |
| <i>C3orf30</i>      | 4.13 | down | <i>ZNF43</i>         | 4.25 | up |
| <i>LINC01555</i>    | 4.13 | down | <i>VGLL3</i>         | 4.25 | up |
| <i>LOC100129775</i> | 4.13 | down | <i>ELOVL4</i>        | 4.24 | up |
| <i>TPK1</i>         | 4.08 | down | <i>ANKRD20A12P</i>   | 4.22 | up |
| <i>IFNA6</i>        | 4.06 | down | <i>PLG</i>           | 4.19 | up |
| <i>MMP13</i>        | 4.05 | down | <i>TNFSF11</i>       | 4.17 | up |
| <i>KLHDC8A</i>      | 4.04 | down | <i>FAP</i>           | 4.16 | up |
| <i>LOC730668</i>    | 4.02 | down | <i>lnc-FGFR1OP-2</i> | 4.14 | up |
| <i>lnc-DIO2-5</i>   | 4.01 | down | <i>PABPC5</i>        | 4.12 | up |
| <i>PRUNE2</i>       | 4.01 | down | <i>EPHA10</i>        | 4.09 | up |
| <i>LOC102724030</i> | 4.00 | down | <i>GRIA1</i>         | 4.08 | up |
| <i>KIAA1024L</i>    | 4.00 | down | <i>FABP9</i>         | 4.07 | up |
| <i>LOC102724921</i> | 3.99 | down | <i>EPHA6</i>         | 4.04 | up |
| <i>LEKR1</i>        | 3.99 | down | <i>SPACA5</i>        | 4.04 | up |
| <i>SLC9C1</i>       | 3.98 | down | <i>KRTAP27-1</i>     | 4.04 | up |
| <i>CYYR1</i>        | 3.98 | down | <i>ZNF703</i>        | 4.02 | up |
| <i>DIO1</i>         | 3.98 | down | <i>PPEF1</i>         | 3.99 | up |
| <i>CP</i>           | 3.96 | down | <i>PRR23B</i>        | 3.97 | up |
| <i>OR5E1P</i>       | 3.95 | down | <i>LOC340113</i>     | 3.92 | up |
| <i>SEMA5B</i>       | 3.95 | down | <i>BTNL3</i>         | 3.92 | up |
| <i>AGVR6190</i>     | 3.94 | down | <i>TBX5-AS1</i>      | 3.90 | up |
| <i>WBP2NL</i>       | 3.92 | down | <i>lnc-SART3-1</i>   | 3.90 | up |
| <i>KC6</i>          | 3.91 | down | <i>CCDC17</i>        | 3.90 | up |
| <i>SAMD7</i>        | 3.91 | down | <i>MROH2A</i>        | 3.89 | up |
| <i>ANGPTL1</i>      | 3.90 | down | <i>PRSS55</i>        | 3.89 | up |
| <i>SGCD</i>         | 3.89 | down | <i>GRID1</i>         | 3.88 | up |
| <i>SOX18</i>        | 3.89 | down | <i>LINC00620</i>     | 3.86 | up |
| <i>XKR4</i>         | 3.88 | down | <i>FLJ41170</i>      | 3.84 | up |
| <i>MXRA5</i>        | 3.87 | down | <i>LINC00518</i>     | 3.82 | up |
| <i>C9orf135-AS1</i> | 3.87 | down | <i>LOC646522</i>     | 3.82 | up |

|                     |      |      |                   |      |    |
|---------------------|------|------|-------------------|------|----|
| <i>LINC00083</i>    | 3.86 | down | <i>CT83</i>       | 3.80 | up |
| <i>LOC339862</i>    | 3.86 | down | <i>LOC339975</i>  | 3.80 | up |
| <i>AADACL4</i>      | 3.85 | down | <i>GJB3</i>       | 3.80 | up |
| <i>LOC649133</i>    | 3.82 | down | <i>LCORL</i>      | 3.77 | up |
| <i>GJA10</i>        | 3.81 | down | <i>CEACAM22P</i>  | 3.77 | up |
| <i>LINC01551</i>    | 3.80 | down | <i>CLPSL1</i>     | 3.74 | up |
| <i>LOC100130642</i> | 3.78 | down | <i>lnc-CYS1-3</i> | 3.73 | up |
| <i>GJD2</i>         | 3.78 | down | <i>PLCH1</i>      | 3.72 | up |
| <i>PSAPL1</i>       | 3.77 | down | <i>IRX2</i>       | 3.70 | up |
| <i>SULT1C2</i>      | 3.77 | down | <i>LINC00473</i>  | 3.69 | up |
| <i>PART1</i>        | 3.75 | down | <i>MMP7</i>       | 3.65 | up |
| <i>HTR5A-AS1</i>    | 3.74 | down | <i>PUS7L</i>      | 3.64 | up |
| <i>PRX</i>          | 3.74 | down | <i>C9orf171</i>   | 3.64 | up |
| <i>LOC643441</i>    | 3.73 | down | <i>XDH</i>        | 3.64 | up |
| <i>SULT1C4</i>      | 3.72 | down | <i>PRRG1</i>      | 3.61 | up |
| <i>LOC401410</i>    | 3.72 | down | <i>LINC01097</i>  | 3.61 | up |
| <i>MAPK4</i>        | 3.71 | down | <i>LINC00376</i>  | 3.60 | up |
| <i>LINC00052</i>    | 3.71 | down | <i>HOXB5</i>      | 3.58 | up |
| <i>RFPL2</i>        | 3.71 | down | <i>ALS2CR11</i>   | 3.58 | up |
| <i>KRTAP26-1</i>    | 3.68 | down | <i>ATG10</i>      | 3.54 | up |
| <i>MGAM</i>         | 3.68 | down | <i>FNDC7</i>      | 3.53 | up |
| <i>LHX3</i>         | 3.66 | down | <i>LOC728339</i>  | 3.53 | up |
| <i>OR5D18</i>       | 3.65 | down | <i>FAM110C</i>    | 3.53 | up |
| <i>C14orf119</i>    | 3.65 | down | <i>SLC44A5</i>    | 3.52 | up |



**Supplementary Table S9. Genes selected for methylation analysis.**

| <b>Genes with under expression in BMMCs exposed to malathion</b> | <b>Genes with over expression in BMMCs exposed to malathion</b> | <b>Genes with under expression in BMMCs exposed to permethrin</b> | <b>Genes with over expression in BMMCs exposed to permethrin</b> |
|------------------------------------------------------------------|-----------------------------------------------------------------|-------------------------------------------------------------------|------------------------------------------------------------------|
| <i>NFIB</i>                                                      | <i>F3</i>                                                       | <i>ADAM30</i>                                                     | <i>ST6GAL2</i>                                                   |
| <i>ADAM32</i>                                                    | <i>IDO1</i>                                                     | <i>PCDH9</i>                                                      | <i>MBD2</i>                                                      |
| <i>FGF22</i>                                                     | <i>IRAK2</i>                                                    | <i>FGFR2</i>                                                      | <i>KITLG</i>                                                     |
| <i>KCNMA1</i>                                                    | <i>SLCO4A1</i>                                                  | <i>ABCC9</i>                                                      | <i>FIGF</i>                                                      |
| <i>ADAMTS20</i>                                                  | <i>DUSP5</i>                                                    | <i>ANKRD31</i>                                                    | <i>IL15RA</i>                                                    |
| <i>AMOT</i>                                                      | <i>PLAUR</i>                                                    | <i>PDGFD</i>                                                      | <i>BDNF</i>                                                      |
| <i>TRPM6</i>                                                     | <i>TFPI2</i>                                                    | <i>TRPM8</i>                                                      | <i>SLC6A20</i>                                                   |
| <i>STK36</i>                                                     | <i>IL15RA</i>                                                   | <i>GATA4</i>                                                      | <i>GDF1</i>                                                      |
| <i>RSPO2</i>                                                     | <i>MYO1B</i>                                                    | <i>SCN9A</i>                                                      | <i>KLB</i>                                                       |
| <i>EDNRB</i>                                                     | <i>INHBA</i>                                                    | <i>AJAP1</i>                                                      | <i>PANX2</i>                                                     |
| <i>TUBB8</i>                                                     | <i>HES4</i>                                                     | <i>TBX15</i>                                                      | <i>JAM2</i>                                                      |
| <i>ADAM11</i>                                                    | <i>EDN1</i>                                                     | <i>USP29</i>                                                      | <i>PARD3</i>                                                     |
| <i>PITX1</i>                                                     | <i>LIF</i>                                                      | <i>LMOD1</i>                                                      | <i>MAPK</i>                                                      |
| <i>LINGO1</i>                                                    | <i>CSF2</i>                                                     | <i>MAPRE3</i>                                                     | <i>IFI27</i>                                                     |
| <i>LRIG3</i>                                                     | <i>NR4A3</i>                                                    | <i>TBX15</i>                                                      | <i>FBLN2</i>                                                     |
| <i>DDR1</i>                                                      | <i>NR4A1</i>                                                    | <i>RBMXL2</i>                                                     | <i>TDRD6</i>                                                     |
| <i>PROZ</i>                                                      | <i>CCL19</i>                                                    | <i>FGFR2</i>                                                      |                                                                  |
|                                                                  | <i>ADM</i>                                                      | <i>MAPRE3</i>                                                     |                                                                  |
|                                                                  | <i>ANGPTL4</i>                                                  | <i>GATA4</i>                                                      |                                                                  |
|                                                                  | <i>MET</i>                                                      | <i>LMOD1</i>                                                      |                                                                  |
|                                                                  | <i>ITGB8</i>                                                    | <i>ADAM30</i>                                                     |                                                                  |
|                                                                  |                                                                 | <i>PROZ</i>                                                       |                                                                  |
|                                                                  |                                                                 | <i>DCHS2</i>                                                      |                                                                  |
|                                                                  |                                                                 | <i>EDNRB</i>                                                      |                                                                  |

\*Genes were selected according to their relevance in cancer and because significant results were observed in the expression analysis.

**Supplementary Table S10. Primers sequences used for qPCR expression analysis.**

| GEN           | REF              | OLIGONUCLEÓTIDO<br>SENTIDO   | OLIGONUCLEOTIDO<br>ANTISENTIDO | SONDA |
|---------------|------------------|------------------------------|--------------------------------|-------|
| <i>PCDH15</i> | NM_001142<br>771 | CAGGAGGAATATGGTGAGGTG        | CATTCTTTTCTTGCCCACTCT          | #73   |
| <i>PCDH9</i>  | NM_020403        | TGGAACAAATCATTCTAACT<br>GC   | TCTCATCACTTATTGGAGACAGC        | #48   |
| <i>IL6</i>    | NM_000600<br>0   | GATGAGTACAAAAGTCCTGAT<br>CCA | CTGCAGCCACTGGTTCTGT            | #40   |
| <i>DSP</i>    | NM_004415        | CTTTGCGCCAATTCAATTAAG        | CCAGTCCTGAGGTGTATGAGG          | #78   |
| <i>LYPD1</i>  | NM_144586        | CGGATTGTTCTTGCTTCCAG         | CCGTGCAATTCACAATGAAC           | #52   |

**Supplementary Table S11. Biological relevance and role in cancer of selected genes with altered expression in cells exposed to insecticides.**

| Gene                                                                                                                                            | Biological relevance and Reports of the effect of insecticides                                                                                                                                                                                                                                                    | Relevance in cancer                                                                                                                                                                                                                                                                                     |
|-------------------------------------------------------------------------------------------------------------------------------------------------|-------------------------------------------------------------------------------------------------------------------------------------------------------------------------------------------------------------------------------------------------------------------------------------------------------------------|---------------------------------------------------------------------------------------------------------------------------------------------------------------------------------------------------------------------------------------------------------------------------------------------------------|
| <b>Genes repressed in BMMCs exposed to malathion</b>                                                                                            |                                                                                                                                                                                                                                                                                                                   |                                                                                                                                                                                                                                                                                                         |
| <b>KCNMA1</b><br>Gene of the calcium-activated potassium channel family. Muscular tone control and neuronal excitability.                       | <i>KCNMA1</i> alterations detected in individuals with hypokalemia and paralysis. Individuals exposed to organophosphates, show low potassium levels. Hypokalemia could be a predictive marker of poisoning with organophosphates. Endosulfan also represses <i>KCNMA1</i> expression (33,34)                     |                                                                                                                                                                                                                                                                                                         |
| <b>ADAM11, ADAM32</b><br>Disintegrin and metalloproteinase family of genes                                                                      |                                                                                                                                                                                                                                                                                                                   | <i>ADAM 11</i> is a tumor suppressor. Repressed in cancer cells, associated with invasion and metastasis [35]                                                                                                                                                                                           |
| <b>PCDH12, PCDH15</b><br>Cell-cell adhesion function<br>Mainly nervous system                                                                   | Murine models showed that organophosphates can lead to the deregulation of protocadherins [36]                                                                                                                                                                                                                    | Participate in proliferation and death. Hypermethylation of members of the protocadherin family has been reported in pre-B ALL and other types of cancer. Can act as tumor suppressors through WNT pathway [37]                                                                                         |
| <b>EDNRB</b><br>Encodes endothelin                                                                                                              | Murine models showed that chlorpyrifos inhibits <i>EDNRB</i> expression in brain cells [38]                                                                                                                                                                                                                       | Hypermethylation reported in different types of leukemia [37]                                                                                                                                                                                                                                           |
| <b>Genes overexpressed in BMMCs exposed to malathion</b>                                                                                        |                                                                                                                                                                                                                                                                                                                   |                                                                                                                                                                                                                                                                                                         |
| <b>IL6</b><br>Pro-inflammatory cytokine                                                                                                         | Released by monocytes, macrophages, T lymphocytes during chronic inflammation. Released by HSCs in response to stressors. [41,42]                                                                                                                                                                                 | Increase of IL6 levels in patients with pre-leukemic and leukemic conditions. Component of tumor microenvironment. It Could promote the progression of disease [41].                                                                                                                                    |
| <b>TNF-<math>\alpha</math></b><br>Promotes de production of IL6                                                                                 |                                                                                                                                                                                                                                                                                                                   | Participates in transformation, proliferation, and extramedullary infiltration of leukemogenesis. It is an essential factor for tumor microenvironment which permits the leukemic cells to evade the immune response, to survive and resist the treatment [42]. Increased expression in pre-B ALL [43]. |
| <b>Genes repressed in PBMCs exposed to malathion</b>                                                                                            |                                                                                                                                                                                                                                                                                                                   |                                                                                                                                                                                                                                                                                                         |
| <b>REX1</b><br>Transcription factor. Marker of embryonic stem cells. Regulates proliferation of human mesenchymal cells through MAPK signaling. | <i>REX1</i> suppression leads to overexpression of proteins of MAPK pathway [49]. In PBMCs exposed to permethrin, the expression of <i>MAP4K3</i> was increased.                                                                                                                                                  |                                                                                                                                                                                                                                                                                                         |
| <b>MEIS1</b><br>Transcription factor vital in normal hematopoiesis.                                                                             | Regulates the response to oxidative stress and metabolism of HSCs. The repression of <i>MEIS1</i> in LT-HSCs (Long-term hematopoietic stem cells) drives cells to a higher intake of oxygen and less glycolytic flux, generating ROS through a mechanism dependent on HIF-1 $\alpha$ and HIF-2 $\alpha$ [50, 51]. | Essential role in leukemogenesis                                                                                                                                                                                                                                                                        |

|                                                                                                                                                                                                                            |                                                                                                                                                                                                                                          |                                                                                                                                                                                                                                                                                             |
|----------------------------------------------------------------------------------------------------------------------------------------------------------------------------------------------------------------------------|------------------------------------------------------------------------------------------------------------------------------------------------------------------------------------------------------------------------------------------|---------------------------------------------------------------------------------------------------------------------------------------------------------------------------------------------------------------------------------------------------------------------------------------------|
| <b>EDNRB</b><br>Encodes endothelin                                                                                                                                                                                         | Murine models showed that chlorpyrifos inhibits <i>EDNRB</i> expression in brain cells [38]                                                                                                                                              | Hypermethylation reported in different types of leukemia [37]                                                                                                                                                                                                                               |
| <b>Genes overexpressed in PBMCs exposed to malathion</b>                                                                                                                                                                   |                                                                                                                                                                                                                                          |                                                                                                                                                                                                                                                                                             |
| <b>GRIK2</b><br>Encodes kainic acid type glutamate receptor, mainly expressed in central nervous system.                                                                                                                   | B cells also express <i>GRIK2</i> , potentiating cell activation.                                                                                                                                                                        | Increased levels of glutamate can promote the proliferation of histolytic lymphoma, and participation of glutamate receptors in signaling has been observed in other types of cancer. <i>GRIK2</i> has been found hypermethylated in LLA and is considered a tumor suppressor gene [52,53]. |
| <b>WNT1, WNT11</b>                                                                                                                                                                                                         |                                                                                                                                                                                                                                          | WNT is an essential pathway in leukemia and lymphoma [54]. Deregulation of WNT pathway genes has been detected in LLA. <i>WNT11</i> promotes the migration of cancer cells, and its expression seems influenced by <i>ERRα</i> and $\beta$ catenin [55].                                    |
| <b>Genes repressed in BMMCs exposed to permethrin</b>                                                                                                                                                                      |                                                                                                                                                                                                                                          |                                                                                                                                                                                                                                                                                             |
| <b>CXCL8</b><br>Chemokine                                                                                                                                                                                                  |                                                                                                                                                                                                                                          | Antitumor role [56].                                                                                                                                                                                                                                                                        |
| <b>OSM</b>                                                                                                                                                                                                                 |                                                                                                                                                                                                                                          | Inhibits myeloid leukemic cell proliferation and modulates the differentiation of various cell types [57].                                                                                                                                                                                  |
| <b>TGFB2</b><br>Belongs to the family of TGF proteins and has an essential role in hematopoiesis regulation, because it negatively regulates proliferation and stimulates differentiation and apoptosis when it is needed. | It is suggested that neurotoxic insecticides can alter the expression of genes of the TGFB pathway; however, this has not been previously reported for pyrethroids [58].                                                                 | In different hematopoietic cancers, deregulation of the TGFB pathway and tumor suppressor function has been described [59]                                                                                                                                                                  |
| <b>GPX8</b><br>This gene encodes a peroxidase glutathione protein (GPx). GPx proteins regulate oxidative stress, having antioxidant activity by removing free radical excess.                                              | The low expression of <i>GPX8</i> may enable permethrin toxicity through the accumulation of ROS and lipid peroxidation. It has been reported that insecticides such as chlorpyrifos induce low expression of the <i>GPX8</i> gene [60]. |                                                                                                                                                                                                                                                                                             |
| <b>GATA4</b><br>Belongs to the family of transcription factors with zinc finger motifs and has a vital role in cardiac, respiratory, gastrointestinal systems and cancer.                                                  |                                                                                                                                                                                                                                          | Has been recognized as a tumor suppressor gene in different types of cancer. Particularly in pediatric leukemia, hypermethylation of the promoter has been detected, although its function in the disease's etiology has not yet been defined [61].                                         |
| <b>SCN2A, SCN11, SCN9A, SCN3B</b><br>Voltage-dependent sodium channels                                                                                                                                                     | These results are relevant because it is known that pyrethroids act on sodium and potassium ion channels to exert their neurotoxic action [62].                                                                                          |                                                                                                                                                                                                                                                                                             |
| <b>PCDH15, PCDH9</b><br>Protocadherins                                                                                                                                                                                     |                                                                                                                                                                                                                                          | Deregulation of these genes is a characteristic of leukemic cells [43].                                                                                                                                                                                                                     |
| <b>Genes overexpressed in BMMCs exposed to permethrin</b>                                                                                                                                                                  |                                                                                                                                                                                                                                          |                                                                                                                                                                                                                                                                                             |

|                                                                                                                                                                                                       |                                                                                                                                                                                                                                                                                                                                                      |                                                                                                                                                                                                                                                                                                                                                                                                                                                          |
|-------------------------------------------------------------------------------------------------------------------------------------------------------------------------------------------------------|------------------------------------------------------------------------------------------------------------------------------------------------------------------------------------------------------------------------------------------------------------------------------------------------------------------------------------------------------|----------------------------------------------------------------------------------------------------------------------------------------------------------------------------------------------------------------------------------------------------------------------------------------------------------------------------------------------------------------------------------------------------------------------------------------------------------|
| <b><i>MBD2</i></b><br>Nucleic acid binding gene.                                                                                                                                                      | It can activate gene expression by recruiting HAT (Histone acetyltransferases) proteins and other transcriptional factors such as TACC3; it can promote DNA demethylation [64] This could partly explain the high frequency of promoters with demethylation observed in BMMCs exposed to permethrin, concordant with an increase in gene expression. |                                                                                                                                                                                                                                                                                                                                                                                                                                                          |
| <b><i>IFIT1</i></b><br>Type1 Interferon family, which participates in biological functions such as defense mechanisms, apoptosis, and inflammation.                                                   |                                                                                                                                                                                                                                                                                                                                                      | It has been reported that <i>IFIT1</i> activation can occur through the JAK/STAT pathway signaling, and it is suggested that high expression of this gene could be a useful biomarker in the diagnosis of myelodysplastic syndromes, before the development of leukemia, because it is an event that precedes the transformations towards acute myeloid leukemia [65,66]. Additionally, the activation of the JAK/STAT pathway is relevant in pre-B ALL. |
| <b>Genes repressed in PBMCs exposed to permethrin</b>                                                                                                                                                 |                                                                                                                                                                                                                                                                                                                                                      |                                                                                                                                                                                                                                                                                                                                                                                                                                                          |
| <b><i>WNT2, WNT4, WNT7A</i></b>                                                                                                                                                                       |                                                                                                                                                                                                                                                                                                                                                      | <i>WNT7A</i> gene participates in carcinogenesis and progression of diverse types of cancer, although its function has been controverted because it has shown repression in certain cases [47,67]. Moreover, in pre-B ALL <i>ETV6-RUNX1</i> positive, hypermethylation of <i>WNT2</i> has been described.                                                                                                                                                |
| <b><i>PCDH9, PCDH15, PCDH12, PCDH114, PCDHGA5</i></b><br>Protocadherins. Cell-cell adhesion proteins mainly found in the central nervous system<br><b><i>CADH19, TCF7L2</i></b><br>Cadherin signaling | Participate in aging                                                                                                                                                                                                                                                                                                                                 | Participate in cancer. Although the role of protocadherins is variable, in some studies, hypermethylation has been detected and thus, they are considered a tumor suppressor [68]. In ALL <i>BCR-ABL1</i> positive, hypermethylation of <i>PCDH12</i> has been observed [42].                                                                                                                                                                            |
| <b><i>PRUNE2</i></b>                                                                                                                                                                                  |                                                                                                                                                                                                                                                                                                                                                      | This gene participates in cell death. This gene has been identified in other types of cancer as a tumor suppressor, and has been determined that its activation leads to an increase in the proliferation of tumor cells [69].                                                                                                                                                                                                                           |
| <b><i>MMP12, MMP2, MMP13</i></b><br>Metalloproteins.                                                                                                                                                  | Participate in Alzheimer's development. Pyrethroids are also associated with the development of this disease. The potential of permethrin to repress genes coding metalloproteinases could be involved in the mechanism by which this pyrethroid induces Alzheimer's and other neurodegenerative diseases [70]                                       |                                                                                                                                                                                                                                                                                                                                                                                                                                                          |
| <b>Genes overexpressed in PBMCs exposed to permethrin.</b>                                                                                                                                            |                                                                                                                                                                                                                                                                                                                                                      |                                                                                                                                                                                                                                                                                                                                                                                                                                                          |
| <b><i>NEU2</i></b><br>Encodes sialidase protein.                                                                                                                                                      | Overexpression of <i>NEU2</i> impedes cell growth, blocking different cell cycle checkpoints and affecting all cell cycle phases. <i>NEU2</i> can also inhibit the PI3K pathway and activate apoptosis through Fas [73].                                                                                                                             | The expression of <i>NEU2</i> is almost undetectable in most tissues. Involvement of this gene in prostate cancer has been reported, in which it has been found repressed.                                                                                                                                                                                                                                                                               |
| <b><i>ROS1</i></b><br>Tyrosine kinase receptor family                                                                                                                                                 |                                                                                                                                                                                                                                                                                                                                                      | Suffers abnormal activation on CD34+ cells in most cases diagnosed as chronic myelomonocytic leukemia, leading to the                                                                                                                                                                                                                                                                                                                                    |

|                                                      |  |                                                                                                                                                                                                                                                                                                                                                                                                                                                                                                                                    |
|------------------------------------------------------|--|------------------------------------------------------------------------------------------------------------------------------------------------------------------------------------------------------------------------------------------------------------------------------------------------------------------------------------------------------------------------------------------------------------------------------------------------------------------------------------------------------------------------------------|
|                                                      |  | activation of the Erk/Akt pathway through the Grb2/SOS complexes [74].                                                                                                                                                                                                                                                                                                                                                                                                                                                             |
| <b><i>KIT</i></b><br>Tyrosine kinase receptor family |  | Normally expressed in hematopoietic stem and progenitor cells of bone marrow, and it is almost not expressed in differentiated cells of peripheral blood. However, the overexpression of <i>KIT</i> has been reported in many tumors. In leukemic cells, the expression of <i>KIT</i> promotes malignant phenotype. <i>KIT</i> plays an essential role in diverse signaling pathways, including PI3K, Ras-Erk, and JAK/STAT, which lead to cancer cell proliferation activation, survival, growth progression, and migration [75]. |
| <b><i>ALK</i></b><br>Tyrosine kinase receptor family |  | Overexpressed in diverse neoplasia, including blood cancer. <i>ALK</i> signaling activates the PI3K/AKT pathways, MAPK/ERK, and STAT3, promoting cell growth, survival, and metastasis of the cancer cell [76].                                                                                                                                                                                                                                                                                                                    |
